# Supplementary material for: T2-high asthma phenotypes across lifespan
Source: PubMed Central journal article supplement — Eur Respir J. 2022 Sep 29;60(3):2102288. doi: 10.1183/13993003.02288-2021 (PMC9520028; doi:10.1183/13993003.02288-2021), 2022-09-29
Supplement: ERJ-02288-2021.Shareable.pdf [file ERJ-02288-2021.Shareable.pdf]

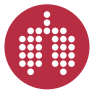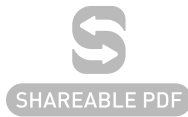

## T2-high asthma phenotypes across lifespan

Nicole Maison <sup>1,2,3</sup>, Jimmy Omony <sup>1,3</sup>, Sabina Illi <sup>1,3</sup>, Dominik Thiele <sup>4,5</sup>, Chrysanthi Skevaki <sup>6,7</sup>, Anna-Maria Dittrich <sup>8,9</sup>, Thomas Bahmer <sup>5,10,11</sup>, Klaus Friedrich Rabe <sup>5,11</sup>, Markus Weckmann <sup>5,12</sup>, Christine Happle <sup>8,9</sup>, Bianca Schaub <sup>2,3</sup>, Meike Meyer <sup>13</sup>, Svenja Foth <sup>7,14</sup>, Ernst Rietschel <sup>13</sup>, Harald Renz <sup>6,7,15</sup>, Gesine Hansen <sup>8,9</sup>, Matthias Volkmar Kopp <sup>5,12,16</sup>, Erika von Mutius <sup>1,2,3</sup>, Ruth Grychtol <sup>8,9</sup> and the ALLIANCE Study Group <sup>17</sup>

<sup>1</sup>Institute for Asthma and Allergy Prevention (IAP), Helmholtz Zentrum Munich, German Research Center for Environmental Health (GmbH), Munich, Germany. <sup>2</sup>Dr von Hauner Children's Hospital, Ludwig Maximilians University, Munich, Germany. <sup>3</sup>Comprehensive Pneumology Center – Munich (CPC-M), Member of German Center for Lung Research (DZL), Munich, Germany. <sup>4</sup>Institute of Medical Biometry and Statistics (IMBS), University Medical Center Schleswig-Holstein, Luebeck, Germany. <sup>5</sup>Airway Research Center North (ARCN), Member of the German Center for Lung Research (DZL), Luebeck, Germany. <sup>6</sup>Institute of Laboratory Medicine and Pathobiochemistry, Molecular Diagnostics, Philipps-University Marburg, Marburg, Germany. <sup>7</sup>Universities of Giessen and Marburg Lung Center (UGMLC), Philipps University Marburg, German Center for Lung Research (DZL), Marburg, Germany. <sup>8</sup>Dept of Pediatric Pneumology, Allergology and Neonatology, Hannover Medical School, Hannover, Germany. <sup>9</sup>Biomedical Research in Endstage and Obstructive Lung Disease Hannover (BREATH), Member of the German Center for Lung Research (DZL), Hannover, Germany. <sup>10</sup>University Hospital Schleswig-Holstein, Campus Kiel, Internal Medicine Department I, Pneumology, Kiel, Germany. <sup>11</sup>LungenClinic Grosshansdorf GmbH, Grosshansdorf, Germany. <sup>12</sup>Division of Pediatric Pneumology and Allergology, University Medical Center Schleswig-Holstein, Luebeck, Germany. <sup>13</sup>Faculty of Medicine, University Children's Hospital, University of Cologne, Cologne, Germany. <sup>14</sup>University Children's Hospital Marburg, University of Marburg, Marburg, Germany. <sup>15</sup>Dept of Clinical Immunology and Allergology, Sechenov University, Moscow, Russia. <sup>16</sup>Dept of Pediatric Respiratory Medicine, Inselspital, University Children's Hospital of Bern, University of Bern, Bern, Switzerland. <sup>17</sup>Members of the ALLIANCE Study Group are listed in the Acknowledgements.

Corresponding author: Erika von Mutius ([erika.von.mutius@med.lmu.de](mailto:erika.von.mutius@med.lmu.de))

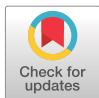

Shareable abstract (@ERSpublications)

**T2-high asthma defined by blood eosinophilia and atopy occurs across all ages and is associated with high levels of allergen-specific IgE, increased propensity for IL-5 production of leukocytes and persistence of asthma into adulthood** <https://bit.ly/35X11EF>

**Cite this article as:** Maison N, Omony J, Illi S, *et al.* T2-high asthma phenotypes across lifespan. *Eur Respir J* 2022; 60: 2102288 [DOI: 10.1183/13993003.02288-2021].

This single-page version can be shared freely online.

Copyright ©The authors 2022.

This version is distributed under the terms of the Creative Commons Attribution Non-Commercial Licence 4.0. For commercial reproduction rights and permissions contact [permissions@ersnet.org](mailto:permissions@ersnet.org)

This article has an editorial commentary: <https://doi.org/10.1183/13993003.01031-2022>

Received: 19 Aug 2021  
Accepted: 4 Feb 2022

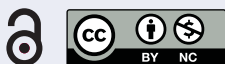

### Abstract

**Rationale** In adults, personalised asthma treatment targets patients with type 2 (T2)-high and eosinophilic asthma phenotypes. It is unclear whether such classification is achievable in children.

**Objectives** To define T2-high asthma with easily accessible biomarkers and compare resulting phenotypes across all ages.

**Methods** In the multicentre clinical All Age Asthma Cohort (ALLIANCE), 1125 participants (n=776 asthmatics, n=349 controls) were recruited and followed for 2 years (1 year in adults). Extensive clinical characterisation (questionnaires, blood differential count, allergy testing, lung function and sputum induction (in adults)) was performed at baseline and follow-ups. Interleukin (IL)-4, IL-5 and IL-13 were measured after stimulation of whole blood with lipopolysaccharide (LPS) or anti-CD3/CD28.

**Measurements and main results** Based on blood eosinophil counts and allergen-specific serum IgE antibodies, patients were categorised into four mutually exclusive phenotypes: “atopy-only”, “eosinophils-only”, “T2-high” (eosinophilia + atopy) and “T2-low” (neither eosinophilia nor atopy). The T2-high phenotype was found across all ages, even in very young children in whom it persisted to a large degree even after 2 years of follow-up. T2-high asthma in adults was associated with childhood onset, suggesting early origins of this asthma phenotype. In both children and adults, the T2-high phenotype was characterised by excessive production of specific IgE to allergens (p<0.0001) and, from school age onwards, by increased production of IL-5 after anti-CD3/CD28 stimulation of whole blood.

**Conclusions** Using easily accessible biomarkers, patients with T2-high asthma can be identified across all ages delineating a distinct phenotype. These patients may benefit from therapy with biologicals even at a younger age.
